# Supplementary material for: Role of Genetic Variation in Cytochromes P450 in Breast Cancer Prognosis and Therapy Response
Source: PubMed Central journal article supplement (PMC8001203; doi:10.3390/ijms22062826), 2021-03-10

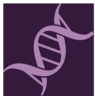

# Role of Genetic Variation in Cytochromes P450 in Breast Cancer Prognosis and Therapy Response

Viktor Hlaváč <sup>1,2\*</sup>, Radka Václavíková <sup>1,2</sup>, Veronika Brynychová <sup>1,2</sup>, Pavel Ostašov<sup>2</sup>, Renata Koževnikovová <sup>3</sup>, Kateřina Kopečková <sup>4</sup>, David Vrána <sup>5</sup>, Jiří Gatěk <sup>6</sup> and Pavel Souček <sup>1,2</sup>

- <sup>1</sup> Toxicogenomics Unit, National Institute of Public Health, 100 00 Prague, Czech Republic; rvaclavikova@seznam.cz (R.V.); veronikabrynychova@seznam.cz (V.B.); pavel.soucek@szu.cz (P.S.)
  - <sup>2</sup> Biomedical Center, Faculty of Medicine in Pilsen, Charles University, 301 00 Pilsen, Czech Republic; pavel.ostasov@lfp.cuni.cz
  - <sup>3</sup> Department of Oncosurgery, MEDICON, 140 00 Prague, Czech Republic; renata.kozevnikovova@onko-centrum.cz
  - <sup>4</sup> Department of Oncology, Second Faculty of Medicine, Charles University and Motol University Hospital, 150 00 Prague, Czech Republic; katerina.kopeckova@fnmotol.cz
  - <sup>5</sup> Comprehensive Cancer Center Novy Jicin, Hospital Novy Jicin, 741 01 Novy Jicin, Czech Republic; davvrana@gmail.com
  - <sup>6</sup> Department of Surgery, EUC Hospital Zlin and Tomas Bata University in Zlin, 763 02 Zlin, Czech Republic; gatekj@gmail.com
- \* Correspondence: viktor.hlavac@szu.cz; Tel.: +420-267-082-711

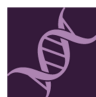

**Supplementary Table S1.** Clinical data of patient in the testing set.

| <b>Characteristics</b>                                   | <b>Patients, N (%)<sup>1</sup></b> |
|----------------------------------------------------------|------------------------------------|
| <i>Age at diagnosis, mean ± S.D.<sup>2</sup> (years)</i> | 51.7 ± 9.4                         |
| <i>Menopausal status</i>                                 |                                    |
| Premenopausal                                            | 46 (46)                            |
| Postmenopausal                                           | 55 (55)                            |
| Missing data                                             | 4                                  |
| <i>Tumor size (pT)</i>                                   |                                    |
| pTis                                                     | 8 (8)                              |
| pT1                                                      | 50 (48)                            |
| pT2                                                      | 40 (39)                            |
| pT3                                                      | 5 (5)                              |
| pTX                                                      | 2                                  |
| <i>Lymph node metastasis (pN)</i>                        |                                    |
| Absent (pN0)                                             | 68 (65)                            |
| Present (pN1-3)                                          | 37 (35)                            |
| <i>Pathological stage</i>                                |                                    |
| SI                                                       | 46 (44)                            |
| SII                                                      | 47 (45)                            |
| SIII                                                     | 12 (11)                            |
| <i>Histological type</i>                                 |                                    |
| Invasive ductal carcinoma                                | 88 (84)                            |
| Other type                                               | 17 (16) <sup>4</sup>               |
| <i>Pathological grade</i>                                |                                    |
| G1                                                       | 11 (11)                            |
| G2                                                       | 35 (35)                            |
| G3                                                       | 54 (54)                            |
| GX                                                       | 5                                  |
| <i>Estrogen receptor status</i>                          |                                    |
| Positive                                                 | 38 (38)                            |
| Negative                                                 | 61 (62)                            |
| Missing data                                             | 6                                  |
| <i>Progesterone receptor status</i>                      |                                    |
| Positive                                                 | 39 (39)                            |
| Negative                                                 | 60 (61)                            |
| Missing data                                             | 6                                  |
| <i>Expression of HER2</i>                                |                                    |
| Positive                                                 | 2 (2)                              |
| Negative                                                 | 97 (97)                            |
| Missing data                                             | 6                                  |
| <i>Expression of Ki-67, mean ± S.D.<sup>2</sup> (%)</i>  | 32.9 ± 20.3                        |

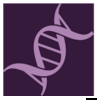

---

|                          |         |
|--------------------------|---------|
| <i>Molecular subtype</i> |         |
| Luminal A                | 11 (11) |
| Luminal B                | 30 (30) |
| Triple negative          | 58 (59) |
| Missing data             | 6       |

---

|                                                  |         |
|--------------------------------------------------|---------|
| <i>Response to neoadjuvant cytotoxic therapy</i> |         |
| Complete or partial response                     | 47 (69) |
| Stable disease or progression                    | 21 (31) |
| Not applicable <sup>3</sup>                      | 37      |

---

Footnotes:

<sup>1</sup> Number of patients with % in parentheses

<sup>2</sup> S.D.=standard deviation

<sup>3</sup> Patients treated with adjuvant therapy without neoadjuvant cytotoxic therapy

<sup>4</sup> Six lobular, six medullary, two metaplastic, one mucinous, one papillary, and one neuroendocrine invasive carcinomas

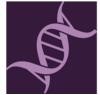

**Supplementary Table S2.** Prioritized variants for the validation phase.

| Gene           | HGVS coding (GRCh38)                  | HGVS protein            | Classification <sup>1</sup>   | Rs ID <sup>2</sup>    | Response <sup>3</sup> | DFS <sup>3</sup> | MAF <sup>4</sup> | GnomAD <sup>5</sup> |
|----------------|---------------------------------------|-------------------------|-------------------------------|-----------------------|-----------------------|------------------|------------------|---------------------|
| <i>CYP1B1</i>  | NC_000002.12:g.38075034C>A            | NP_000095.2:p.Ala119Ser | Missense                      | rs1056827             | 0.029                 | NS               | 0.34             | 0.31                |
| <i>CYP2S1</i>  | NC_000019.10:g.41198050A>G            | -                       | Intron                        | rs184623              | NS                    | 0,030            | 0.38             | 0.36                |
| <i>CYP2W1</i>  | NC_000007.14:g.988812C>T              | -                       | Intron                        | rs3808348             | 0.036                 | NS               | 0.20             | 0.20                |
| <i>CYP2W1</i>  | NC_000007.14:g.983092T>C              | -                       | Intron                        | rs12701220            | NS                    | 0,038            | 0.11             | 0.21                |
| <i>CYP4A11</i> | NC_000001.11:g.46933071G>C            | -                       | Intron                        | rs3890011             | 0.029                 | NS               | 0.27             | 0.22                |
| <i>CYP4F2</i>  | NC_000019.10:g.15886010G>A            | NP_001073.3:p.His343=   | Synonymous                    | rs2074900             | 0.006                 | NS               | 0.32             | 0.32                |
| <i>CYP4F2</i>  | NC_000019.10:g.15879238A>G            | -                       | Intron                        | rs3093198             | 0.011                 | NS               | 0.29             | 0.30                |
| <i>CYP4F8</i>  | NC_000019.10:g.15618245C>G            | -                       | Intron                        | rs714772              | NS                    | 0,011            | 0.25             | 0.20                |
| <i>CYP4F8</i>  | NC_000019.10:g.15615549G>T            | -                       | Intron                        | rs4646522             | NS                    | 0,030            | 0.42             | 0.48                |
| <i>CYP4F12</i> | NC_000019.10:g.15697020T>C            | NP_076433.3:p.Leu504=   | Synonymous                    | rs593421 <sup>6</sup> | 0.017                 | NS               | 0.29             | 0.27                |
| <i>CYP4F12</i> | NC_000019.10:g.15697074A>G            | NP_076433.3:p.Ser522Arg | Missense                      | rs593818              | NS                    | 0,015            | 0.43             | 0.45                |
| <i>CYP4F12</i> | NC_000019.10:g.15680322T>A            | -                       | Intron                        | rs2074568             | 0.029                 | NS               | 0.21             | 0.16                |
| <i>CYP4V2</i>  | NC_000004.12:g.186194623G>C           | -                       | Intron                        | rs62350517            | NS                    | 0,007            | 0.08             | 0.06                |
| <i>CYP4X1</i>  | NC_000001.11:g.47029933A>G            | -                       | Intron                        | rs17102977            | 0.013                 | NS               | 0.10             | 0.08                |
| <i>CYP24A1</i> | NC_000020.11:g.54171775T>C            | -                       | Intron                        | rs2259735             | NS                    | 0,026            | 0.39             | 0.40                |
| <i>CYP24A1</i> | NC_000020.11:g.54154722G>A            | -                       | 3'-UTR                        | rs2762934             | NS                    | 0,018            | 0.17             | 0.19                |
| <i>CYP24A1</i> | NC_000020.11:g.54171474A>G            | -                       | Intron                        | rs6022999             | NS                    | 0,003            | 0.21             | 0.24                |
| <i>CYP24A1</i> | NC_000020.11:g.54153515_54153516insAT | -                       | 3'-UTR                        | rs10623012            | NS                    | 0,015            | 0.32             | 0.40                |
| <i>CYP26B1</i> | NC_000002.12:g.72130207C>T            | -                       | 3'-UTR                        | rs61138718            | NS                    | 0,018            | 0.11             | 0.14                |
| <i>CYP26B1</i> | NC_000002.12:g.72129135C>G            | -                       | Downstream Transcript Variant | rs62150087            | NS                    | 0,011            | 0.07             | 0.10                |
| <i>CYP27C1</i> | NC_000002.12:g.127193883C>T           | -                       | Intron                        | rs12476709            | 0.029                 | NS               | 0.47             | 0.41                |
| <i>TBXAS1</i>  | NC_000007.14:g.139913631T>C           | -                       | Intron                        | rs3819733             | 0.013                 | NS               | 0.15             | 0.14                |

Footnotes:

<sup>1</sup>Classification in Annovar

<sup>2</sup> SNV number in dbSNP (<https://www.ncbi.nlm.nih.gov/snp/>)

<sup>3</sup> *p*-value provided for clinical associations; NS = non-significant

<sup>4</sup> MAF = minor allele frequency in the evaluation set

<sup>5</sup> The Genome Aggregation Database (gnomAD), MAF in European non-Finnish population

<sup>6</sup> Variant replacing failed rs79882219 (*p* = 0.011 with response) based on tagging analysis



**Supplementary Table S3.** Clinical data of patients in the validation set.

| <b>Characteristics</b>                                   | <b>Patients, N (%)<sup>1</sup></b> |
|----------------------------------------------------------|------------------------------------|
| <i>Age at diagnosis, mean ± S.D.<sup>2</sup> (years)</i> | 58.9 ± 12.5                        |
| <i>Menopausal status</i>                                 |                                    |
| Premenopausal                                            | 196 (25)                           |
| Postmenopausal                                           | 592 (75)                           |
| Missing data                                             | 14                                 |
| <i>Tumor size (pT)</i>                                   |                                    |
| pTis                                                     | 65 (8)                             |
| pT1                                                      | 488 (62)                           |
| pT2                                                      | 206 (27)                           |
| pT3                                                      | 18 (2)                             |
| pT4                                                      | 10 (1)                             |
| pTX                                                      | 15                                 |
| <i>Lymph node metastasis (pN)</i>                        |                                    |
| Absent (pN0)                                             | 507 (67)                           |
| Present (pN1-3)                                          | 252 (33)                           |
| pNX                                                      | 43                                 |
| <i>Pathological stage</i>                                |                                    |
| S0                                                       | 61 (8)                             |
| SI                                                       | 343 (46)                           |
| SII                                                      | 282 (38)                           |
| SIII                                                     | 64 (9)                             |
| SIV                                                      | 1 (0)                              |
| Not determined                                           | 51                                 |
| <i>Histological type</i>                                 |                                    |
| Invasive ductal carcinoma                                | 596 (75)                           |
| Other type                                               | 196 (25)                           |
| Missing data                                             | 10                                 |
| <i>Pathological grade</i>                                |                                    |
| G1                                                       | 177 (23)                           |
| G2                                                       | 382 (50)                           |
| G3                                                       | 209 (27)                           |
| GX                                                       | 34                                 |
| <i>Estrogen receptor status</i>                          |                                    |
| Positive                                                 | 615 (77)                           |
| Negative                                                 | 181 (23)                           |
| Missing data                                             | 6                                  |
| <i>Progesterone receptor status</i>                      |                                    |
| Positive                                                 | 577 (73)                           |
| Negative                                                 | 219 (27)                           |
| Missing data                                             | 6                                  |



|                                                                        |                 |
|------------------------------------------------------------------------|-----------------|
| <i>Expression of HER2</i>                                              |                 |
| Positive                                                               | 194 (24)        |
| Negative                                                               | 600 (76)        |
| Missing data                                                           | 8               |
| <hr/>                                                                  |                 |
| <i>Expression of Ki-67, mean <math>\pm</math> S.D.<sup>2</sup> (%)</i> | 23.3 $\pm$ 22.6 |
| <hr/>                                                                  |                 |
| <i>Molecular subtype</i>                                               |                 |
| Luminal A                                                              | 320 (40)        |
| Luminal B                                                              | 315 (40)        |
| Triple negative                                                        | 94 (12)         |
| HER2                                                                   | 63 (8)          |
| Missing data                                                           | 10              |
| <hr/>                                                                  |                 |
| <i>Response to neoadjuvant cytotoxic therapy</i>                       |                 |
| Complete or partial response                                           | 127 (76)        |
| Stable disease or progression                                          | 41 (24)         |
| Not applicable <sup>3</sup>                                            | 634             |
| <hr/>                                                                  |                 |

Footnotes:

<sup>1</sup>Number of patients with % in parentheses

<sup>2</sup>S.D.=standard deviation

<sup>3</sup>Patients treated with adjuvant therapy without neoadjuvant cytotoxic therapy

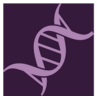

**Supplementary Figure S1:** The effect of breast cancer molecular subtypes on significant associations of cytochrome P450 variants with DFS of the patients in the confirmation set.

Blue line depicts for common homozygous and green for rare allele.

**a) All patients (n=744)**

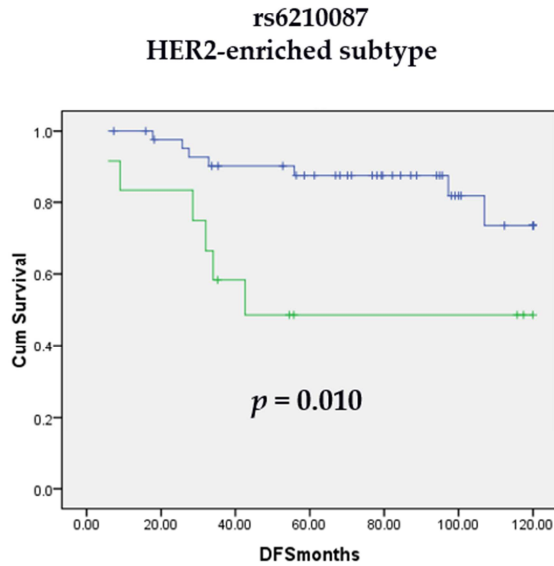

**b) Patients treated with cytotoxic therapy (n=371)**

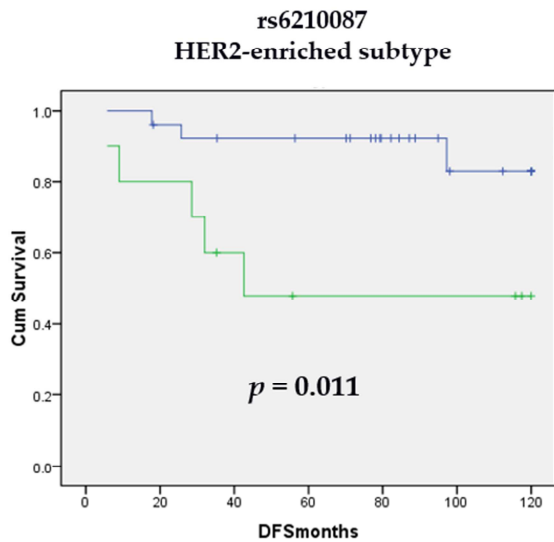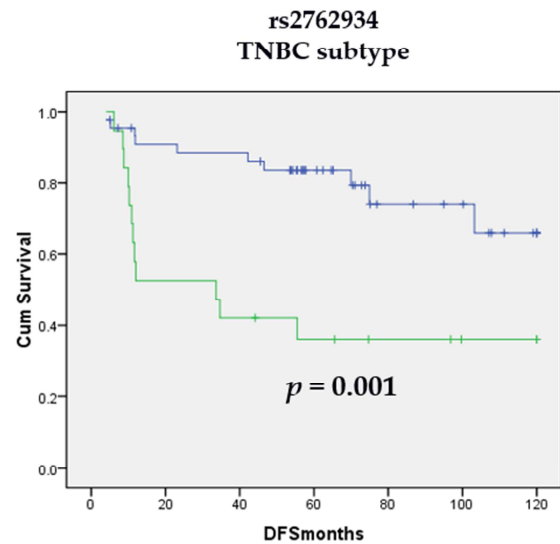

Supplement: ijms-22-02826-s001.pdf [file ijms-22-02826-s001.pdf]
